# Supplementary material for: High-yield cell-free synthesis of human EGFR by IRES-mediated protein translation in a continuous exchange cell-free reaction format
Source: PubMed Central journal article supplement (PMC4960648; doi:10.1038/srep30399), 2016-07-26
Supplement: srep30399-s1.pdf [file srep30399-s1.pdf]

## Supplementary Information

High-yield cell-free synthesis of human EGFR by IRES-mediated protein translation in a continuous exchange cell-free reaction format

### Authors

Robert B. Quast, Andrei Sonnabend, Marlitt Stech, Doreen A. Wüstenhagen, Stefan Kubick

### Affiliations

Fraunhofer Institute for Cell Therapy and Immunology (IZI), Branch Bioanalytics and Bioprocesses (IZI-BB), Am Mühlenberg 13, D-14476 Potsdam, Germany

To whom correspondence should be addressed: Dr. Stefan Kubick, Fraunhofer Institute for Cell Therapy and Immunology (IZI), Branch Bioanalytics and Bioprocesses (IZI-BB), Am Mühlenberg 13, 14476 Potsdam, stefan.kubick@izi-bb.fraunhofer.de, Tel: +49 331 58 187 -306 / Fax -119

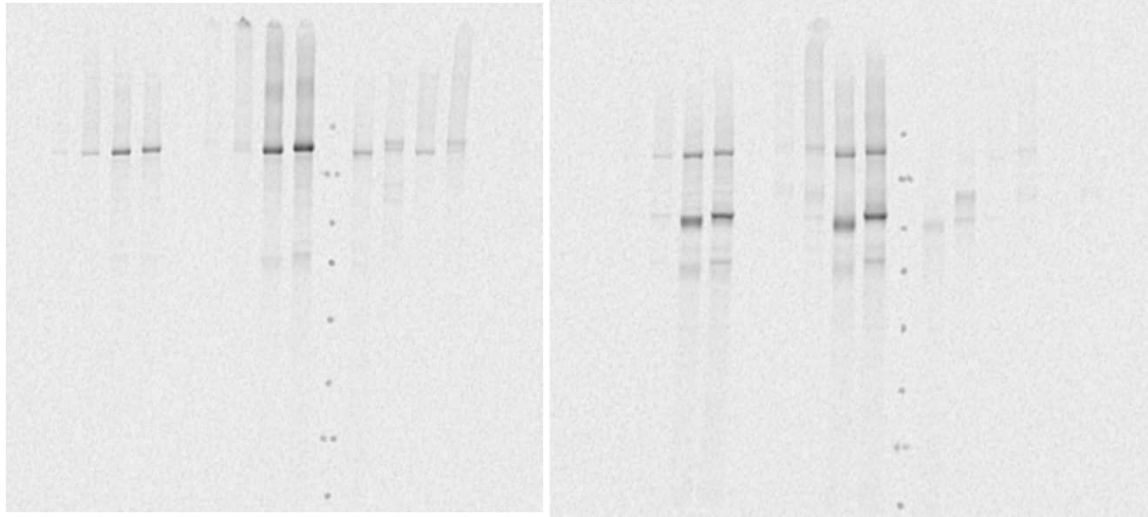

Supplementary figure 1 | Original unmodified autoradiograms shown in figure 1 (left) and 2 (right).

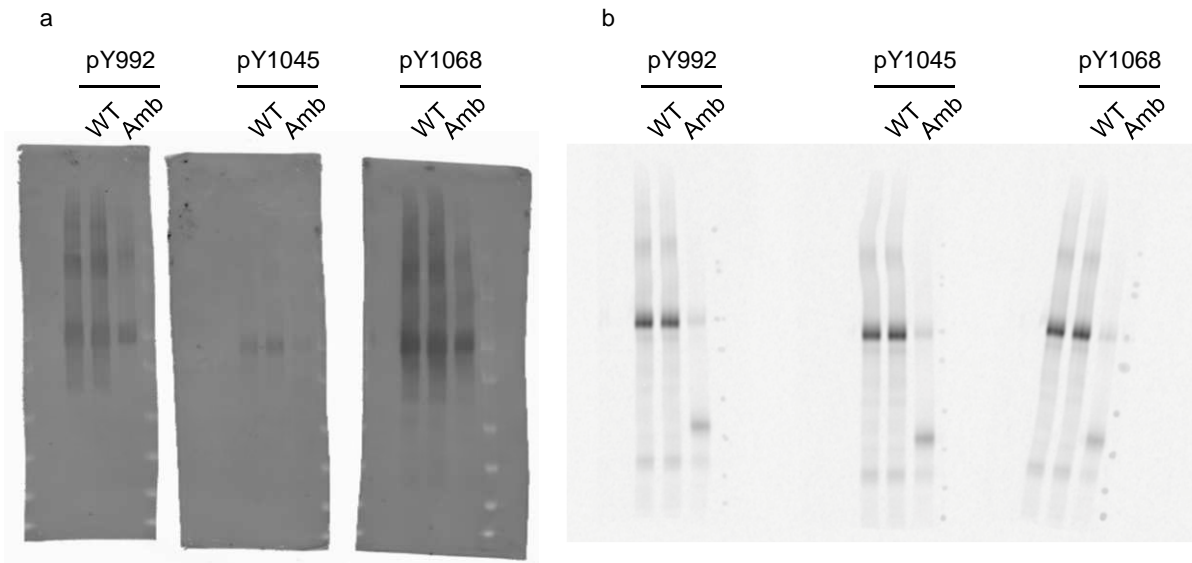

Supplementary figure 2 | Original unmodified blots (a) and corresponding autoradiograms (b) shown in figure 3. Unspecified lanes have no relevance in this publication.

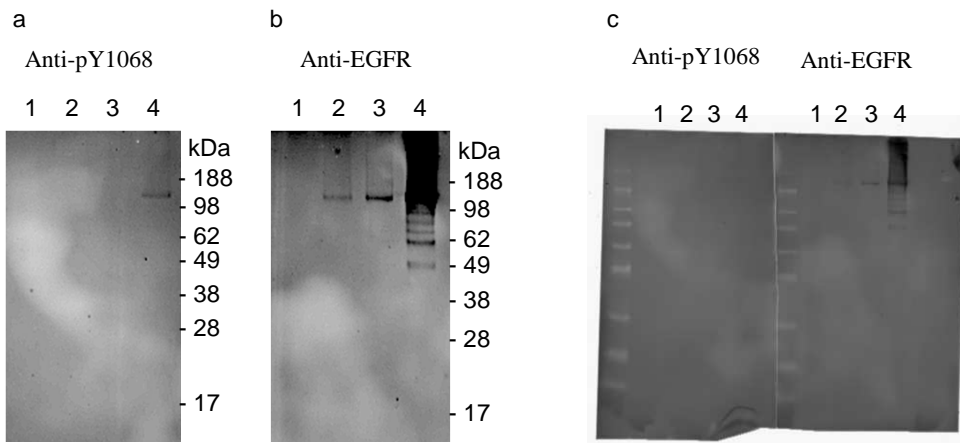

Supplementary figure 3 | Comparison of total and functional amount of EGFR-eYFP in the microsomal fraction. Aliquots of the microsomal fraction of cell-free synthesis reactions using the CrPV-IRES-EGFR-eYFP template in the CECF mode were either used directly for electrophoretic separation followed by immunoblotting (2), preliminarily dephosphorylated in 1 x cut smart buffer with calf intestinal phosphatase (3) or dephosphorylated and subsequently incubated in kinas buffer with ATP (4). A control reaction without a gene template (1) was performed in parallel. The phosphorylated receptors were detected using an EGFR specific antibody (b) and a phosphotyrosine 1068 specific antibody (a). The contrast, brightness and sharpness have been adapted in a and b. c shows the original non-adapted blots.

a

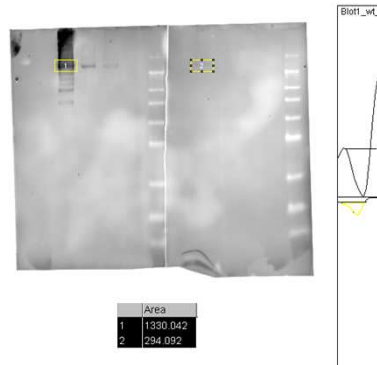

b

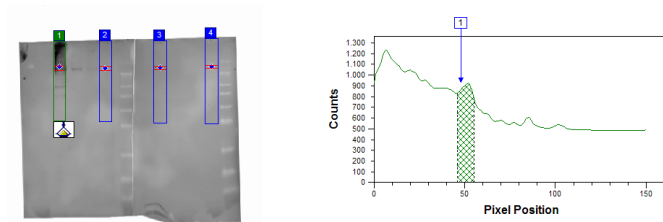

|        | Band No. | Position | Volume    | Vol-BKGnd | Calib. Vol(ing) | Area   | Band % | Band % (Norm) | Lane % | MW (kd) | Rf    |
|--------|----------|----------|-----------|-----------|-----------------|--------|--------|---------------|--------|---------|-------|
| Lane 1 | 1        | 45       | 174244.76 | 174244.76 | -               | 195.00 | 100.00 | 0.00          | 7.58   | 188.000 | 0.320 |
| Lane 2 | 1        | 52       | 79307.81  | 79307.81  | -               | 144.00 | 100.00 | 0.00          | 3.94   | -       | 0.338 |
| Lane 3 | 1        | 51       | 85387.89  | 85387.89  | -               | 144.00 | 100.00 | 0.00          | 4.11   | -       | 0.327 |
| Lane 4 | 1        | 54       | 66821.89  | 66821.89  | -               | 144.00 | 100.00 | 0.00          | 3.60   | -       | 0.333 |

Supplementary figure 4 | Screenshots of estimation of functional proportion of EGFR-eYFP based on western blots shown in supplementary figure 3 using either the ImageJ (a) or the ImageQuant (b) software.

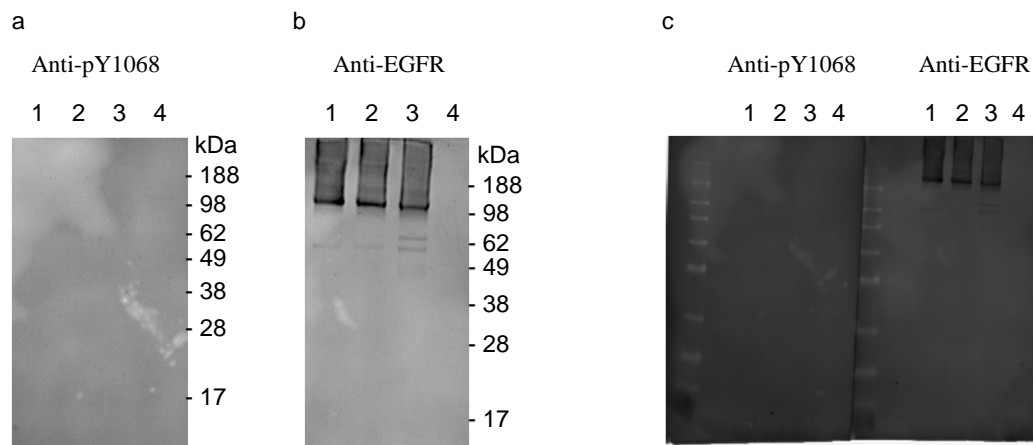

Supplementary figure 5 | Comparison of total and functional amount EGFR-eYFP in the supernatant fraction. Aliquots of the supernatant fraction of cell-free synthesis reactions using the CrPV-IRES-EGFR-eYFP template in the CECF mode were either used directly for electrophoretic separation followed by immunoblotting (1), preliminarily dephosphorylated in 1 x cut smart buffer with calf intestinal phosphatase (2) or dephosphorylated and subsequently incubated in kinase buffer with ATP (3). A control reaction without a gene template (4) was performed in parallel. The phosphorylated receptors were detected using an EGFR specific antibody (b) and a phosphotyrosine 1068 specific antibody (a). The contrast, brightness and sharpness have been adapted in a and b. c shows the original non-adapted blots.

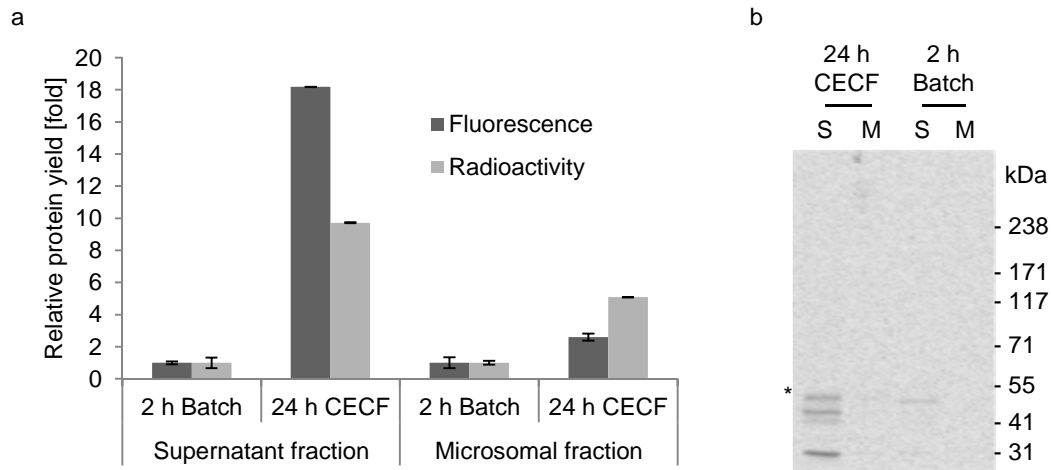

Supplementary figure 6 | IRES-mediated cell-free synthesis of Grb2-mCherry in batch and CECF reaction mode. a) Relative protein yields in supernatant (SF) and microsomal fraction (MF) in relation to the standard batch reaction (+ IRES) determined by analysis of mCherry fluorescence and incorporated  $^{14}\text{C}$ -leucine. Error bars represent the standard deviation of triplicate analysis. b) Corresponding autoradiogram after electrophoretic protein separation. The full-length Grb2-mCherry is marked by an asterisk.

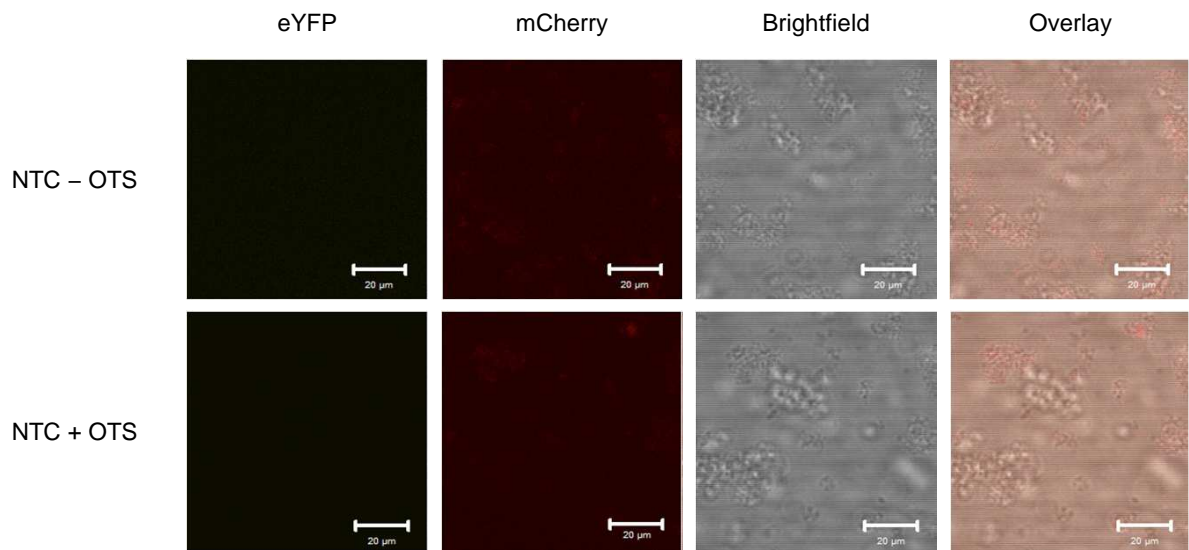

Supplementary figure 7 | Interaction of cell-free synthesized Grb2-mCherry with *Sf21* microsomes in the absence of receptor. Microsomal fractions from control reactions without gene template (NTC) carried out in the absence (– OTS) or presence of the orthogonal translation system (+ OTS) were incubated with soluble Grb2-mCherry in kinase buffer and after centrifugation subjected to CLSM.
